# Supplementary material
Source: PubMed Central journal article supplement (PMC5750096)

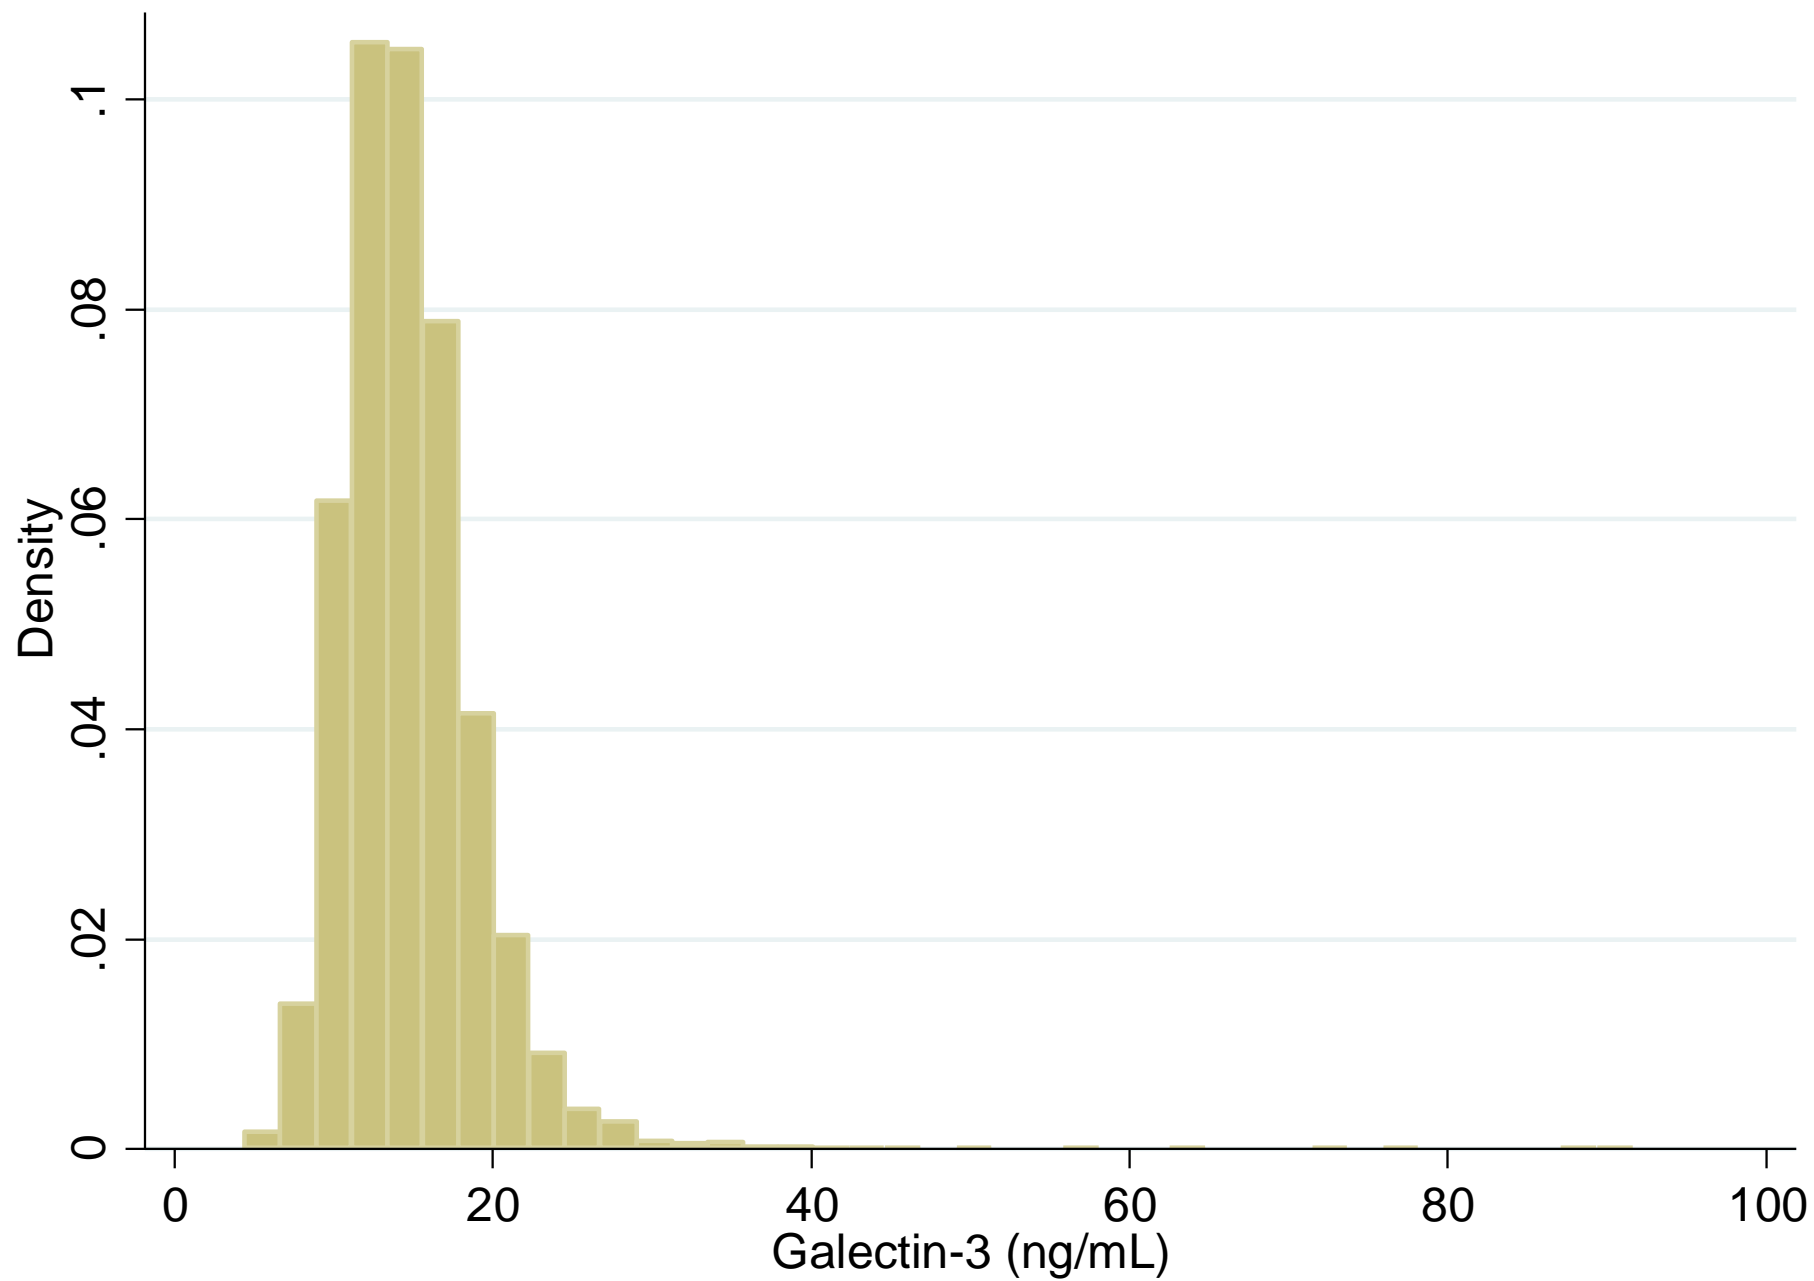

Supplement: NIHMS891495-supplement-1.pdf [file NIHMS891495-supplement-1.pdf]

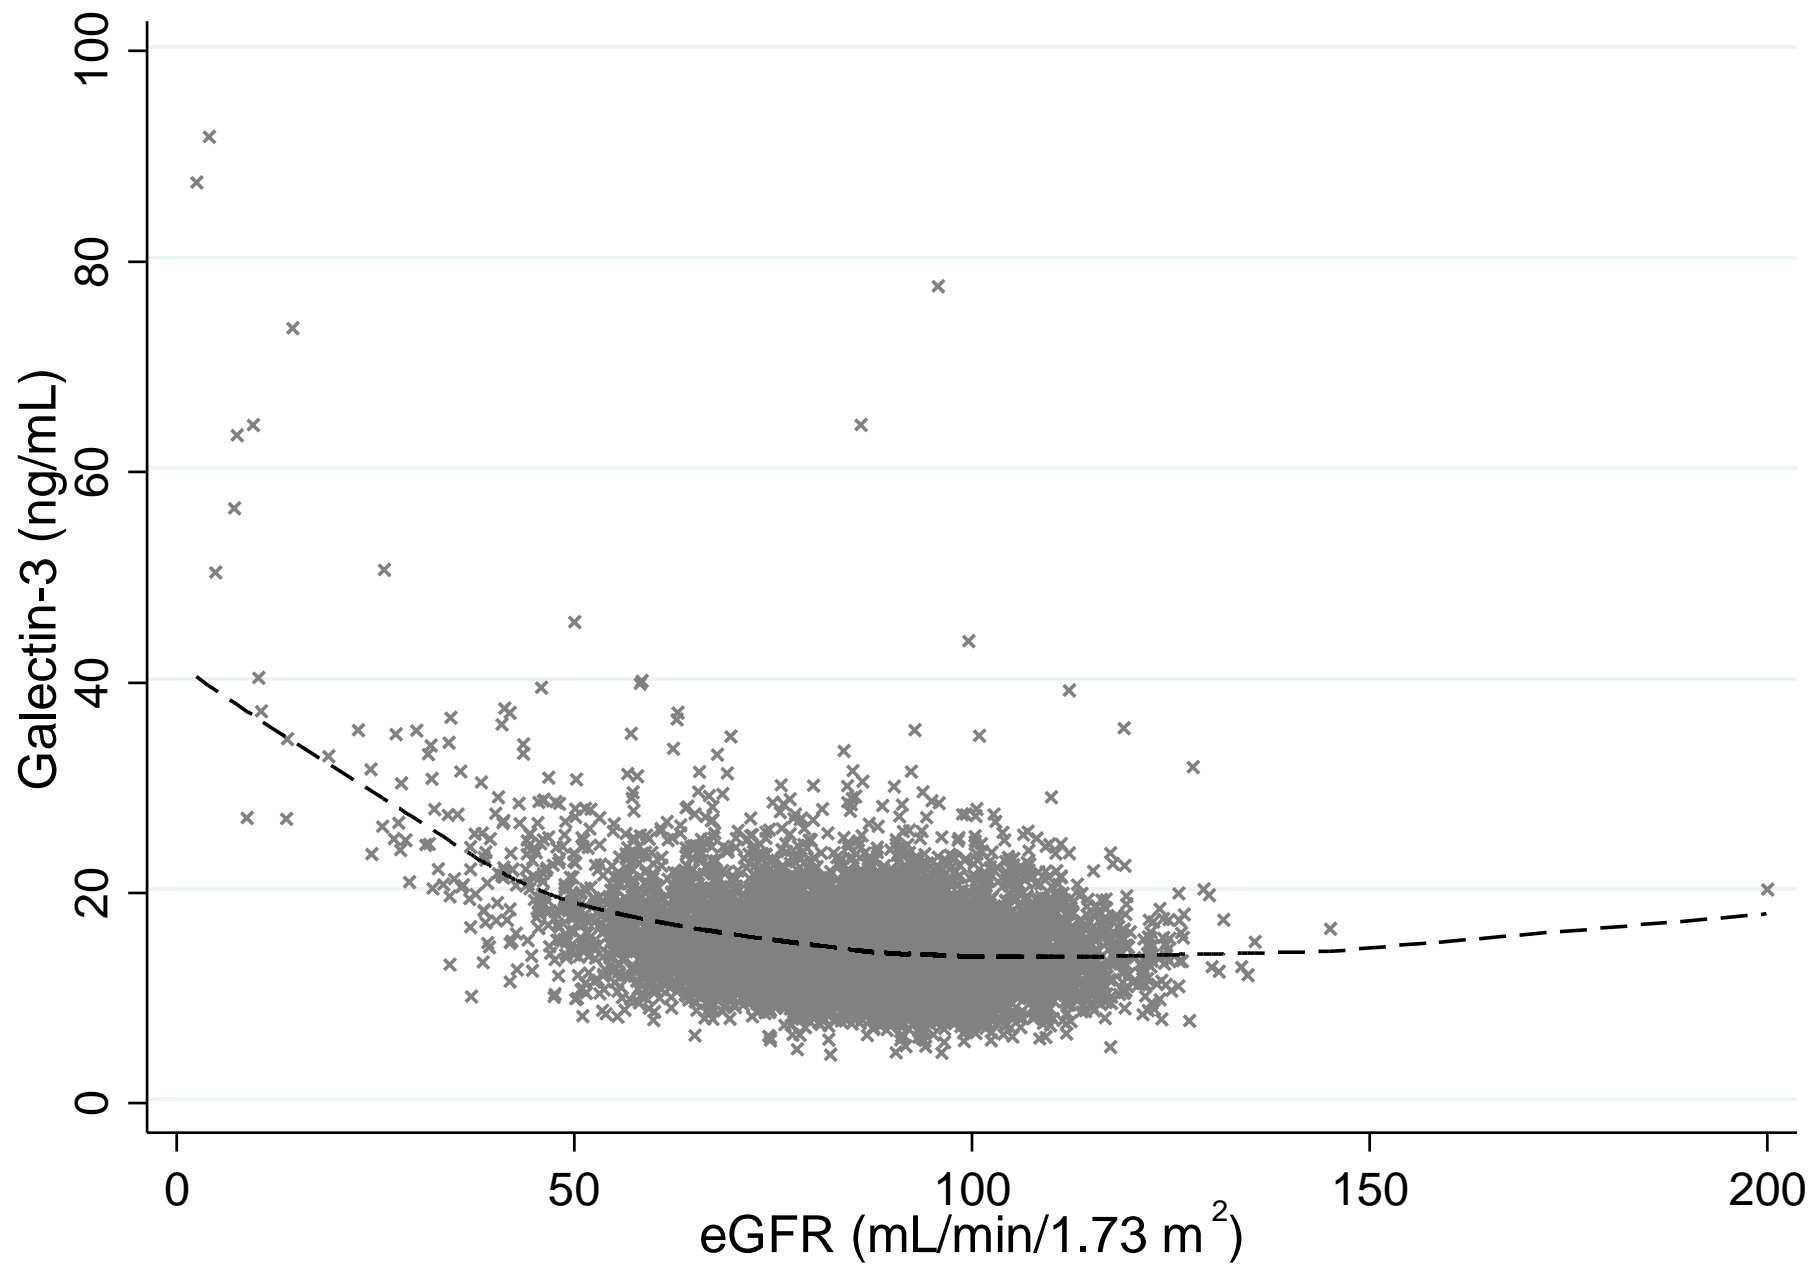

Supplement: NIHMS891495-supplement-2.pdf [file NIHMS891495-supplement-2.pdf]

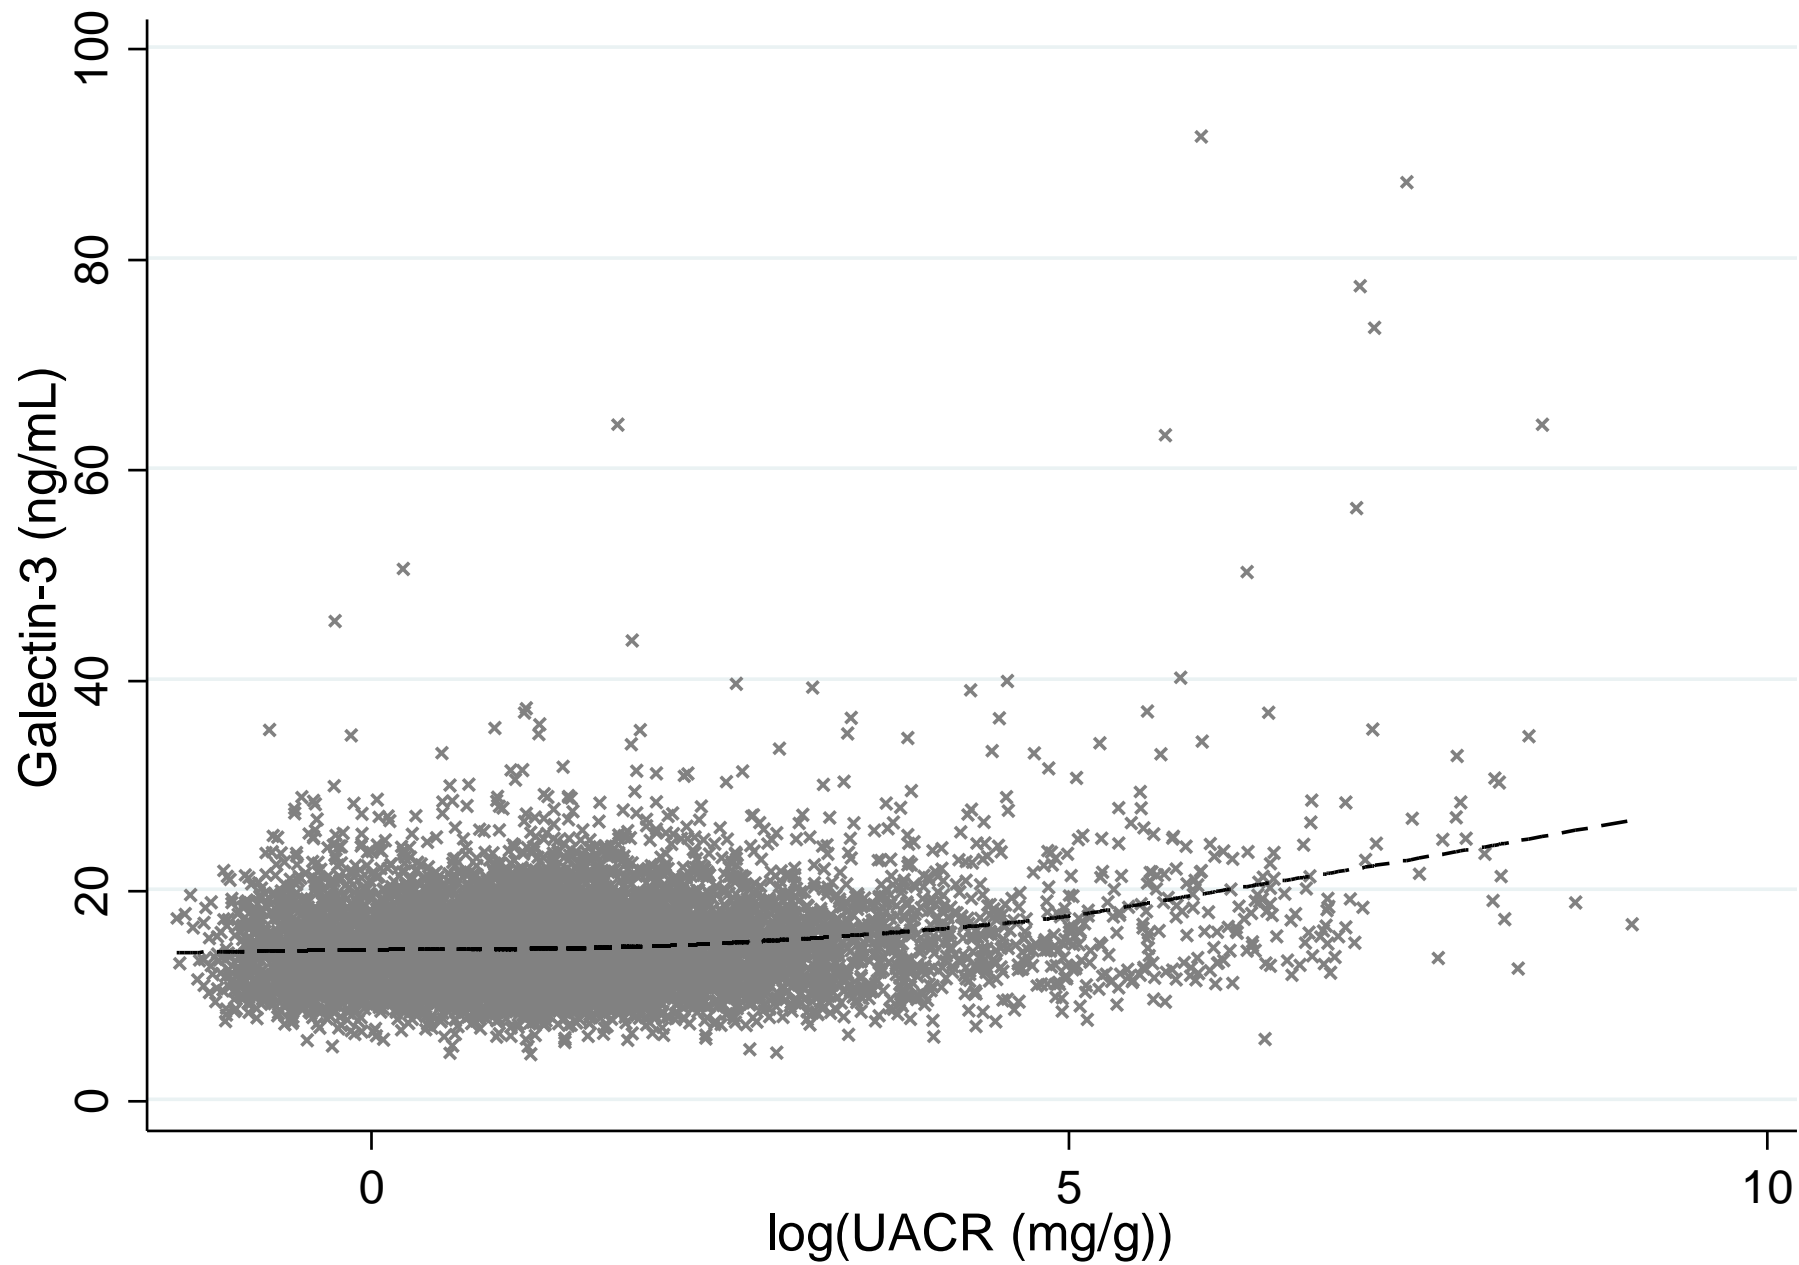

Supplement: NIHMS891495-supplement-3.pdf [file NIHMS891495-supplement-3.pdf]
